# Supplementary material
Source: HighWire-hosted journal article supplement (https://www.annfammed.org/highwire/filestream/25571/field_highwire_adjunct_files/0/Vasan.pdf)
Supplement: Vasan.pdf [file Vasan.pdf]

## Supplemental materials for

Vasan A, Beatty B, DiFiore G, et al. Connecting families to benefit programs through a standardized nutrition screener. *Ann Fam Med*. 2024;22(3):259-259.

## REFERENCES

1. National and State Level Estimates of WIC Eligibility and Program Reach in 2020. USDA Food and Nutrition Service. Accessed Apr 8, 2023.  
<https://www.fns.usda.gov/wic/eligibility-and-program-reach-estimates-2020>
2. Soneji S, Beltrán-Sánchez H. Association of Special Supplemental Nutrition Program for Women, Infants, and Children with preterm birth and infant mortality. *JAMA Netw Open*. 2019;2(12):e1916722. 10.1001/jamanetworkopen.2019.16722
3. Dillman L, Eichner J, Humienny A, et al. The impact of Supplemental Nutrition Assistance Program (SNAP) enrollment on health and cost outcomes. *NEJM Catalyst*. 2023;4(6):CAT.22.0366. 10.1056/CAT.22.0366
4. Bird CL, McClelland JW. Changing attitudes and knowledge toward SNAP application. *Am J Health Promot*. 2018;32(2):312-314. 10.1177/0890117117709793
5. Barnes C, Riel V. ‘I don’t know nothing about that’: how “learning costs” undermine COVID-related efforts to make SNAP and WIC more accessible. *Adm Soc*. 2022;54(10):1902-1930. 10.1177/00953997211073948
6. Dalembert G, Fiks AG, O’Neill G, Rosin R, Jenssen BP. Impacting poverty with medical financial partnerships focused on tax incentives. *NEJM Catal*. 2021;2(4). 10.1056/CAT.20.0594
7. Monroe BS, Rengifo LM, Wingler MR, et al. Assessing and improving WIC enrollment in the primary care setting: a quality initiative. *Pediatrics*. 2023;152(2):e2022057613. 10.1542/peds.2022-057613
